# Supplementary material for: Microelectrode Sensor for Real-Time Measurements of Nitrite in the Living Brain, in the Presence of Ascorbate
Source: MDPI journal article supplement (doi:10.3390/bios11080277), 2021-08-17
Supplement: s1 [file s1]

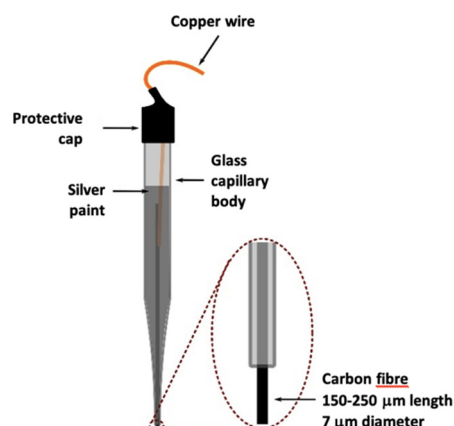

**Figure S1.** Schematic representation of a homemade glass-encased carbon fiber microelectrode. The electrical contact between the fiber and the copper wire was made using conductive silver paint.

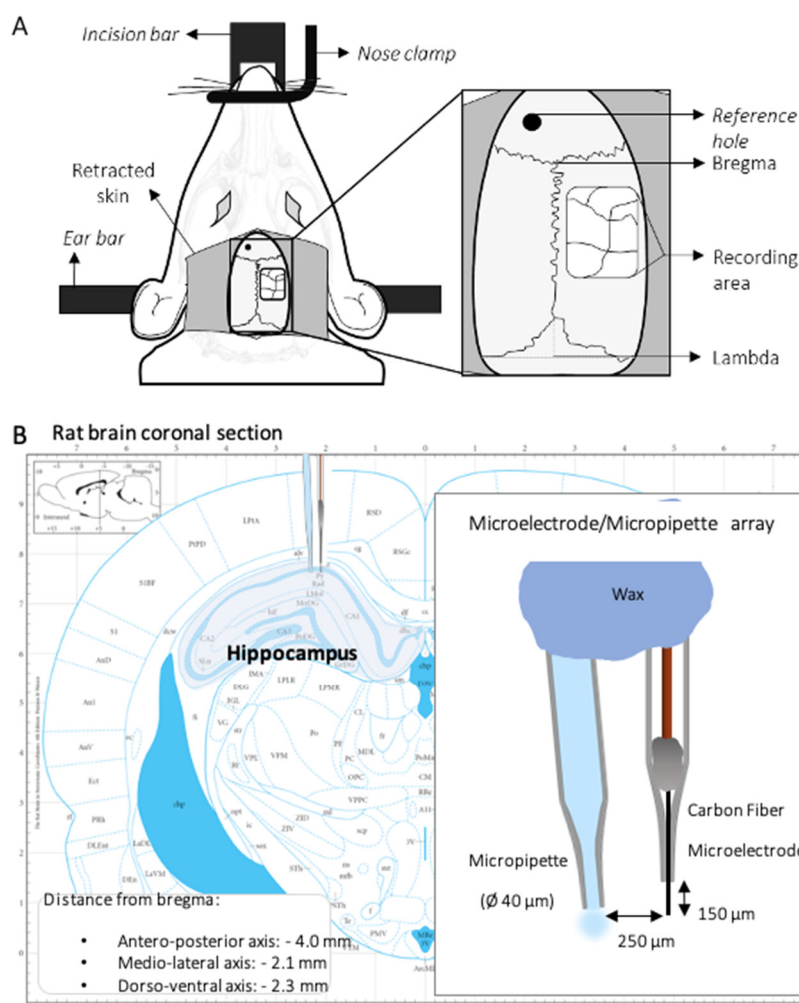

**Figure S2.** Schematic representation of (A) the animal in the stereotaxic frame and (B) the placement of the array used in the electrochemical recordings (microelectrode attached to an ejection micropipette) in the hippocampus (CA1 subregion). Adapted with permission from ref. [40]. 2007 Elsevier.
